# Supplementary material for: Ethnobotanical Knowledge, Nutritional Composition, and Aroma Profile of Vicia kulingiana Bailey: An Underutilized Wild Vegetable Endemic to China
Source: MDPI journal article supplement (doi:10.3390/foods13060916), 2024-03-18
Supplement: s1 [file s1]

Table S1 Volatile components of *V. kulingiana* leaves analyzed by HS-SPME-GC-MS

| No. | Formula                                        | Compounds                                                   | Types                    | RI   | Odor                                                                     | I(%) |
|-----|------------------------------------------------|-------------------------------------------------------------|--------------------------|------|--------------------------------------------------------------------------|------|
| 1   | C <sub>13</sub> H <sub>20</sub> O              | $\beta$ -Ionone                                             | Terpenoids               | 1491 | floral,<br>woody,<br>sweet,<br>fruity,<br>berry,<br>tropical,<br>beeswax | 8.24 |
| 2   | C <sub>12</sub> H <sub>26</sub>                | 2,2,4,6,6-Pentamethylheptane                                | Hydrocarbons             | 990  |                                                                          | 3.2  |
| 3   | C <sub>10</sub> H <sub>14</sub> O              | 3-(4-Methyl-3-pentenyl)furan                                | Terpenoids               | 1101 | woody                                                                    | 2.37 |
| 4   | C <sub>10</sub> H <sub>18</sub> O              | Linalool                                                    | Terpenoids               | 1101 | floral,<br>green                                                         | 1.68 |
| 5   | C <sub>10</sub> H <sub>14</sub> O              | 2,6,6-Trimethylbicyclo[3.2.0]hept-2-en-7-one                | Ketone                   | 1108 |                                                                          | 1.68 |
| 6   | C <sub>10</sub> H <sub>14</sub>                | (3 <i>E</i> ,5 <i>E</i> )-2,6-Dimethyl-1,3,5,7-octatetraene | Hydrocarbons             | 1131 |                                                                          | 1.66 |
| 7   | C <sub>11</sub> H <sub>16</sub> O <sub>2</sub> | Dihydroactinidiolide                                        | Heterocyclic<br>compound | 1532 | musky,<br>coumari<br>n                                                   | 1.55 |
| 8   | C <sub>10</sub> H <sub>14</sub> O              | (1-Methoxypropyl)benzene                                    | Aromatics                | 1104 |                                                                          | 1.52 |
| 9   | C <sub>11</sub> H <sub>15</sub> Br             | (5-Bromopentyl)benzene                                      | Aromatics                | 1487 |                                                                          | 1.43 |
| 10  | C <sub>5</sub> H <sub>6</sub> OS               | 2-Methyl-3-furanthiol                                       | Heterocyclic<br>compound | 870  | sulfury,<br>meaty,<br>fishy,<br>metallic                                 | 1.35 |
| 11  | C <sub>6</sub> H <sub>10</sub> N <sub>4</sub>  | 3,5-Dimethyl-1 <i>H</i> -pyrazole-1-carboximidamide         | Heterocyclic<br>compound | 1096 |                                                                          | 1.28 |
| 12  | C <sub>6</sub> H <sub>14</sub> N <sub>2</sub>  | 1-Methylpyrrolidine-2-methylamine                           | Heterocyclic<br>compound | 1104 |                                                                          | 1.23 |
| 13  | C <sub>9</sub> H <sub>18</sub> O               | 1-Nonen-4-ol                                                | Alcohol                  | 1103 |                                                                          | 1.17 |
| 14  | C <sub>14</sub> H <sub>22</sub>                | 1,5-Cycloundecadiene,<br>8,8-dimethyl-9-methylene-          | Hydrocarbons             | 1485 |                                                                          | 1.17 |
| 15  | C <sub>8</sub> H <sub>16</sub> O               | 3-Cyclopentyl-1-propanol                                    | Alcohol                  | 1102 |                                                                          | 1.06 |
| 16  | C <sub>8</sub> H <sub>7</sub> NO               | 1,3-Dihydro-2 <i>H</i> -indol-2-one                         | Heterocyclic<br>compound | 1478 |                                                                          | 1.04 |
| 17  | C <sub>15</sub> H <sub>24</sub>                | Eremophilene                                                | Terpenoids               | 1494 |                                                                          | 0.96 |
| 18  | C <sub>15</sub> H <sub>24</sub>                | .Alpha.-muurolene                                           | Terpenoids               | 1499 | woody                                                                    | 0.94 |
| 19  | C <sub>15</sub> H <sub>24</sub>                | 1-Methyl-4-(6-methylhept-5-en-2-yl)cyclohexa-<br>1,3-diene  | Terpenoids               | 1482 |                                                                          | 0.91 |
| 20  | C <sub>8</sub> H <sub>8</sub> O <sub>3</sub>   | 1-(2,4-Dihydroxyphenyl)ethanone                             | Ketone                   | 1538 |                                                                          | 0.87 |
| 21  | C <sub>6</sub> H <sub>12</sub> O               | ( <i>Z</i> )-Hex-3-en-1-ol                                  | Alcohol                  | 856  | fresh,<br>green,<br>grass,<br>foliage,<br>vegetabl                       | 0.86 |

|    |                                               |                                                        |                    |      |                                                           |      |
|----|-----------------------------------------------|--------------------------------------------------------|--------------------|------|-----------------------------------------------------------|------|
|    |                                               |                                                        |                    |      | e,<br>herbal,<br>oily                                     |      |
| 22 | C <sub>15</sub> H <sub>24</sub>               | 5-(1,5-Dimethyl-4-hexenyl)-2-methyl-1,3-cyclohexadiene | Terpenoids         | 1495 | spice, fresh, sharp                                       | 0.84 |
| 23 | C <sub>15</sub> H <sub>22</sub>               | 1-Methyl-4-(6-methylhept-5-en-2-yl)benzene             | Terpenoids         | 1483 | herbal                                                    | 0.84 |
| 24 | C <sub>15</sub> H <sub>22</sub>               | Eudesma-2,4,11-triene                                  | Terpenoids         | 1479 |                                                           | 0.84 |
| 25 | C <sub>4</sub> H <sub>5</sub> N <sub>3</sub>  | Iminodiacetonitrile                                    | Nitrogen compounds | 1108 |                                                           | 0.83 |
| 26 | C <sub>10</sub> H <sub>16</sub> O             | Carvenone                                              | Terpenoids         | 1257 | spearmint                                                 | 0.82 |
| 27 | C <sub>10</sub> H <sub>16</sub> O             | 6-Isopropyl-3-methylcyclohex-2-enone                   | Terpenoids         | 1261 | herbal, minty, camphor, medicinal                         | 0.82 |
| 28 | C <sub>8</sub> H <sub>11</sub> N              | Benzeneethanmine                                       | Amine              | 1102 | ammoniacal, fishy                                         | 0.8  |
| 29 | C <sub>8</sub> H <sub>14</sub> O <sub>3</sub> | Butanoic acid, anhydride                               | Others             | 1120 | buttery                                                   | 0.77 |
| 30 | C <sub>8</sub> H <sub>14</sub> O <sub>3</sub> | Hexanoic acid, 3-oxo-, ethyl ester                     | Ester              | 1120 | fruity, pineapple, green, sweet, licorice, vanilla        | 0.77 |
| 31 | C <sub>10</sub> H <sub>16</sub> O             | Fenchone                                               | Terpenoids         | 1096 | herbal, cedar leaf, bitter, thuja, camphor, earthy, woody | 0.72 |
| 32 | C <sub>8</sub> H <sub>18</sub> O              | 3-Octanol                                              | Alcohol            | 994  | earthy, mushroom, herbal, melon, citrus, woody, spicy,    | 0.69 |

|    |                                                |                                                              |                       |      |          |      |
|----|------------------------------------------------|--------------------------------------------------------------|-----------------------|------|----------|------|
|    |                                                |                                                              |                       |      | minty    |      |
| 33 | C <sub>6</sub> H <sub>8</sub> S                | 3-Ethyl-thiophene                                            | Heterocyclic compound | 869  | styrene  | 0.64 |
| 34 | C <sub>7</sub> H <sub>12</sub> O <sub>2</sub>  | 2,2-Dimethyl-3-pentenoic acid                                | Acid                  | 997  |          | 0.63 |
| 35 | C <sub>10</sub> H <sub>18</sub> O              | 2-Methyl-6-methylene-7-octen-4-ol                            | Terpenoids            | 1097 |          | 0.62 |
| 36 | C <sub>6</sub> H <sub>13</sub> N               | CyclohexylAmine                                              | Amine                 | 862  |          | 0.6  |
| 37 | C <sub>10</sub> H <sub>16</sub>                | 1,6-Dimethyl-1,5-cyclooctadiene                              | Hydrocarbons          | 1103 |          | 0.6  |
| 38 | C <sub>11</sub> H <sub>24</sub>                | Undecane                                                     | Hydrocarbons          | 1100 | alkane   | 0.58 |
| 39 | C <sub>8</sub> H <sub>16</sub> O               | 1-Octen-3-ol                                                 | Alcohol               |      | fatty,   | 0.58 |
|    |                                                |                                                              |                       |      | fruity,  |      |
|    |                                                |                                                              |                       |      | grassy,  |      |
|    |                                                |                                                              |                       | 980  | mushro   |      |
|    |                                                |                                                              |                       |      | om,      |      |
|    |                                                |                                                              |                       |      | perfumy  |      |
|    |                                                |                                                              |                       |      | , sweet  |      |
| 40 | C <sub>9</sub> H <sub>16</sub> O <sub>2</sub>  | (Z)-Hex-3-en-1-yl propionate                                 | Ester                 |      | green,   | 0.56 |
|    |                                                |                                                              |                       |      | fresh,   |      |
|    |                                                |                                                              |                       |      | fruity,  |      |
|    |                                                |                                                              |                       |      | apple,   |      |
|    |                                                |                                                              |                       | 1100 | pear,    |      |
|    |                                                |                                                              |                       |      | vegetabl |      |
|    |                                                |                                                              |                       |      | e,       |      |
|    |                                                |                                                              |                       |      | melon,   |      |
|    |                                                |                                                              |                       |      | banana,  |      |
|    |                                                |                                                              |                       |      | peach    |      |
| 41 | C <sub>4</sub> H <sub>7</sub> N <sub>3</sub> O | 1-(2-Hydroxyethyl)-1,2,4-triazole                            | Heterocyclic compound | 1095 |          | 0.55 |
| 42 | C <sub>11</sub> H <sub>20</sub>                | 1-Undecyne                                                   | Hydrocarbons          | 1095 |          | 0.54 |
| 43 | C <sub>10</sub> H <sub>16</sub> O              | 2,7,7-Trimethyl-3-oxatricyclo[4.1.1.0 <sup>2,4</sup> ]octane | Terpenoids            | 1103 | green    | 0.53 |
| 44 | C <sub>5</sub> H <sub>11</sub> NS <sub>3</sub> | N,N-Dimethyl-1,2,3-trithian-5-Amine                          | Heterocyclic compound | 1491 |          | 0.52 |
| 45 | C <sub>8</sub> H <sub>10</sub> O               | (4-Methylphenyl)methanol                                     | Alcohol               | 1106 | mild,    | 0.49 |
|    |                                                |                                                              |                       |      | floral   |      |
| 46 | C <sub>7</sub> H <sub>8</sub> O                | 2-Methylphenol                                               | Phenol                | 1053 | phenol   | 0.48 |
| 47 | C <sub>8</sub> H <sub>14</sub> O <sub>2</sub>  | 5-Butyldihydrofuran-2(3H)-one                                | Ester                 |      | sweet,   | 0.46 |
|    |                                                |                                                              |                       |      | coconut, |      |
|    |                                                |                                                              |                       |      | waxy,    |      |
|    |                                                |                                                              |                       | 1261 | creamy,  |      |
|    |                                                |                                                              |                       |      | tonka,   |      |
|    |                                                |                                                              |                       |      | dairy,   |      |
|    |                                                |                                                              |                       |      | fatty    |      |
| 48 | C <sub>15</sub> H <sub>32</sub>                | Pentadecane                                                  | Hydrocarbons          | 1499 | waxy     | 0.46 |
| 49 | C <sub>13</sub> H <sub>20</sub> O              | 1,1,4A-Trimethyl-3,4,4a,5,6,7-hexahydronaphthalen-2(1H)-one  | Ketone                | 1491 |          | 0.44 |

|    |                                               |                                                                  |                       |      |                                                             |      |
|----|-----------------------------------------------|------------------------------------------------------------------|-----------------------|------|-------------------------------------------------------------|------|
| 50 | C <sub>11</sub> H <sub>24</sub>               | 5-Methyl-decane                                                  | Hydrocarbons          | 1057 |                                                             | 0.41 |
| 51 | C <sub>15</sub> H <sub>24</sub>               | Beta-eudesmene                                                   | Terpenoids            | 1486 | herbal                                                      | 0.41 |
| 52 | C <sub>6</sub> H <sub>8</sub> O <sub>2</sub>  | 5-Ethyl-2(5 <i>H</i> )-furanone                                  | Heterocyclic compound | 966  | spice                                                       | 0.41 |
| 53 | C <sub>10</sub> H <sub>18</sub> O             | Isoborneol                                                       | Terpenoids            | 1170 | pine, woody, camphor                                        | 0.41 |
| 54 | C <sub>10</sub> H <sub>18</sub> O             | Endo-borneol                                                     | Terpenoids            | 1170 | pine, woody, camphor, balsamic                              | 0.41 |
| 55 | C <sub>6</sub> H <sub>12</sub> O <sub>2</sub> | Isobutyl acetate                                                 | Ester                 | 773  | sweet, fruity, ethereal, banana, tropical                   | 0.4  |
| 56 | C <sub>17</sub> H <sub>36</sub>               | 2,6,10-Trimethyl-tetradecane                                     | Hydrocarbons          | 1539 |                                                             | 0.4  |
| 57 | C <sub>8</sub> H <sub>7</sub> NO <sub>3</sub> | 7-Hydroxy-6-methylfuro[3,4- <i>c</i> ]pyridin-1(3 <i>H</i> )-one | Heterocyclic compound | 1484 |                                                             | 0.4  |
| 58 | C <sub>6</sub> H <sub>10</sub> O              | Trans-2-hexenal                                                  | Aldehyde              | 853  | sweet, almond, fruity, green, leafy, apple, plum, vegetable | 0.4  |
| 59 | C <sub>6</sub> H <sub>10</sub> O              | ( <i>E</i> )-Hex-2-enal                                          | Aldehyde              | 853  | green, grassy                                               | 0.4  |
| 60 | C <sub>10</sub> H <sub>18</sub> O             | 7-Methyl-3-methylene-6-octen-1-ol                                | Terpenoids            | 1195 |                                                             | 0.39 |
| 61 | C <sub>13</sub> H <sub>28</sub>               | 5,7-Dimethylundecane                                             | Hydrocarbons          | 1190 |                                                             | 0.39 |
| 62 | C <sub>8</sub> H <sub>8</sub> O <sub>2</sub>  | Benzoic acid, methyl ester                                       | Ester                 | 1098 | phenol, wintergreen, almond, floral, canga                  | 0.39 |
| 63 | C <sub>15</sub> H <sub>32</sub>               | 4-Methyltetradecane                                              | Hydrocarbons          | 1459 |                                                             | 0.37 |
| 64 | C <sub>13</sub> H <sub>28</sub>               | 2,3,5-Trimethyldecane                                            | Hydrocarbons          | 1411 |                                                             | 0.37 |
| 65 | C <sub>10</sub> H <sub>14</sub> O             | 2,6,6-Trimethylcyclohexa-1,3-dienecarbaldehyde                   | Terpenoids            | 1206 | fresh, herbal, phenol,                                      | 0.36 |

|    |                                               |                                                          |                          |      |                                                                     |      |
|----|-----------------------------------------------|----------------------------------------------------------|--------------------------|------|---------------------------------------------------------------------|------|
|    |                                               |                                                          |                          |      | metallic,<br>rosemar<br>y,<br>tobacco,<br>spicy                     |      |
| 66 | C <sub>8</sub> H <sub>8</sub> O               | BenzeneacetAldehyde                                      | Aldehyde                 | 1046 | floral,<br>honey,<br>rose,<br>cherry                                | 0.36 |
| 67 | C <sub>10</sub> H <sub>14</sub> O             | 2,6,6-Trimethyl-2,4-cycloheptadien-1-one                 | Terpenoids               | 1243 | minty                                                               | 0.36 |
| 68 | C <sub>14</sub> H <sub>30</sub>               | 4,6-Dimethyldodecane,                                    | Hydrocarbons             | 1325 |                                                                     | 0.36 |
| 69 | C <sub>14</sub> H <sub>30</sub>               | Tetradecane                                              | Hydrocarbons             | 1400 | mild,<br>waxy                                                       | 0.36 |
| 70 | C <sub>10</sub> H <sub>20</sub> O             | Levomenthol                                              | Terpenoids               | 1177 | minty                                                               | 0.34 |
| 71 | C <sub>10</sub> H <sub>14</sub>               | 1-Butylbenzene                                           | Aromatics                | 1054 |                                                                     | 0.33 |
| 72 | C <sub>4</sub> H <sub>4</sub> N <sub>2</sub>  | Pyrazine                                                 | Heterocyclic<br>compound | 726  | pungent<br>, sweet,<br>corn,<br>roasted,<br>hazelnut<br>, barley    | 0.33 |
| 73 | C <sub>13</sub> H <sub>28</sub>               | 3-Methyl-5-propylnonane                                  | Hydrocarbons             | 1185 |                                                                     | 0.33 |
| 74 | C <sub>10</sub> H <sub>18</sub> O             | Tetrahydro-4-methyl-2-(2-methyl-1-propenyl)-<br>2H-pyran | Terpenoids               | 1113 | sweet,<br>floral,<br>aromatic<br>, rose,<br>fresh,<br>bay,<br>leafy | 0.31 |
| 75 | C <sub>5</sub> H <sub>6</sub> S <sub>2</sub>  | 2-Thiophenemethanethiol                                  | Heterocyclic<br>compound | 1105 | roasted,<br>coffee,<br>fishy                                        | 0.31 |
| 76 | C <sub>10</sub> H <sub>8</sub> O <sub>2</sub> | 3-Methyl-2H-chromen-2-one                                | Heterocyclic<br>compound | 1490 |                                                                     | 0.3  |
| 77 | C <sub>10</sub> H <sub>16</sub> O             | (Z)-(3,3-Dimethylcyclohexylidene)acetaldehyd<br>e        | Aldehyde                 | 1226 |                                                                     | 0.3  |
| 78 | C <sub>9</sub> H <sub>12</sub> O <sub>2</sub> | 3,4-Dimethoxytoluene                                     | Aromatics                | 1233 |                                                                     | 0.3  |
| 79 | C <sub>10</sub> H <sub>18</sub> O             | 3,7-Dimethyl-3Z,6-octadien-1-ol                          | Terpenoids               | 1240 |                                                                     | 0.3  |
| 80 | C <sub>6</sub> H <sub>10</sub> O <sub>2</sub> | 5-Ethyl-dihydrofuran-2(3H)-one                           | Ester                    | 1055 | sweet,<br>caramel                                                   | 0.3  |
| 81 | C <sub>7</sub> H <sub>10</sub> O <sub>3</sub> | 5-Ethyl-3-hydroxy-4-methylfuran-2(5H)-one                | Heterocyclic<br>compound | 1195 | sweet,<br>fruity,<br>caramel,<br>maple,                             | 0.3  |

|    |                                                |                                         |                       |      |                                                                                  |      |
|----|------------------------------------------------|-----------------------------------------|-----------------------|------|----------------------------------------------------------------------------------|------|
|    |                                                |                                         |                       |      | fenugreek,<br>brown,<br>sugar,<br>nutty,<br>chicory,<br>praline,<br>butterscotch |      |
| 82 | C <sub>9</sub> H <sub>12</sub> O <sub>2</sub>  | 2-Acetyl-4,4-dimethyl-cyclopent-2-enone | Ketone                | 1213 |                                                                                  | 0.3  |
| 83 | C <sub>12</sub> H <sub>16</sub> O <sub>3</sub> | 2-Phenoxyethyl isobutyrate              | Ester                 |      | green,<br>fruity,<br>1488 waxy,<br>apple,<br>nuances                             | 0.29 |
| 84 | C <sub>10</sub> H <sub>16</sub> O              | (2Z)-3,7-Dimethylocta-2,6-dienal        | Terpenoids            |      | sweet,<br>1240 citral,<br>lemon,<br>peel                                         | 0.29 |
| 85 | C <sub>8</sub> H <sub>17</sub> N               | N-Allyl-N-methylbutylamine              | Amine                 | 856  |                                                                                  | 0.29 |
| 86 | C <sub>2</sub> H <sub>4</sub> N <sub>4</sub>   | Dicyandiamide                           | Nitrogen<br>compounds | 866  |                                                                                  | 0.29 |
| 87 | C <sub>15</sub> H <sub>24</sub>                | Germacrene D                            | Terpenoids            | 1481 | woody,<br>spice                                                                  | 0.28 |
| 88 | C <sub>9</sub> H <sub>12</sub>                 | 1-Ethyl-3-methylbenzene                 | Aromatics             | 957  |                                                                                  | 0.28 |
| 89 | C <sub>9</sub> H <sub>18</sub> O               | 1-Nonanal                               | Aldehyde              |      | aldehyde,<br>1105 citrus,<br>orange<br>peel                                      | 0.27 |
| 90 | C <sub>15</sub> H <sub>24</sub>                | Bicyclosesquiphellandrene               | Terpenoids            | 1489 |                                                                                  | 0.27 |
| 91 | C <sub>15</sub> H <sub>24</sub>                | Beta-guaiene                            | Terpenoids            |      | sweet,<br>woody,<br>dry,<br>1490 guaiacwood,<br>spicy,<br>powdery                | 0.27 |
| 92 | C <sub>10</sub> H <sub>18</sub> O <sub>3</sub> | 2-Methylbutanoic anhydride              | Others                | 1190 |                                                                                  | 0.26 |
| 93 | C <sub>8</sub> H <sub>12</sub> O               | 3,5-Octadien-2-one                      | Ketone                |      | fruity,<br>1073 green,<br>grassy                                                 | 0.26 |
| 94 | C <sub>8</sub> H <sub>12</sub> O               | 3,5-Octadien-2-one                      | Ketone                | 1091 | fruity,<br>fatty,                                                                | 0.26 |

|     |                                                |                                                        |                             |      |  |                        |      |
|-----|------------------------------------------------|--------------------------------------------------------|-----------------------------|------|--|------------------------|------|
|     |                                                |                                                        |                             |      |  | mushroom               |      |
| 95  | C <sub>8</sub> H <sub>8</sub> O <sub>3</sub>   | 4-Hydroxyphenylacetic acid                             | Acid                        | 1551 |  |                        | 0.24 |
| 96  | C <sub>6</sub> H <sub>8</sub> O <sub>4</sub>   | 2-Furancarboxylic tetrahydro-3-methyl-5-oxo-           | acid, Heterocyclic compound | 1304 |  |                        | 0.23 |
| 97  | C <sub>10</sub> H <sub>8</sub>                 | 0phthalene                                             | Aromatics                   |      |  | pungent                | 0.23 |
|     |                                                |                                                        |                             | 1190 |  | , dry, tarry           |      |
| 98  | C <sub>10</sub> H <sub>18</sub> O <sub>2</sub> | 1-Octen-1-ol, acetate                                  | Alcohol                     | 1191 |  |                        | 0.22 |
| 99  | C <sub>7</sub> H <sub>6</sub> O                | BenzAldehyde                                           | Aldehyde                    |      |  | sweet,                 | 0.21 |
|     |                                                |                                                        |                             | 962  |  | bitter, almond, cherry |      |
| 100 | C <sub>9</sub> H <sub>8</sub> S                | 3-Methylbenzothiophene                                 | Heterocyclic compound       | 1315 |  |                        | 0.21 |
| 101 | C <sub>9</sub> H <sub>16</sub> O               | (Z)-6-Nonenal                                          | Aldehyde                    |      |  | green, cucumb          | 0.21 |
|     |                                                |                                                        |                             |      |  | er, melon, cantalou    |      |
|     |                                                |                                                        |                             |      |  | pe,                    |      |
|     |                                                |                                                        |                             | 1104 |  | honeyde                |      |
|     |                                                |                                                        |                             |      |  | w,                     |      |
|     |                                                |                                                        |                             |      |  | waxy,                  |      |
|     |                                                |                                                        |                             |      |  | vegetabl               |      |
|     |                                                |                                                        |                             |      |  | e, orris,              |      |
|     |                                                |                                                        |                             |      |  | violet,                |      |
|     |                                                |                                                        |                             |      |  | leafy                  |      |
| 102 | C <sub>13</sub> H <sub>20</sub> O              | 4-(4-Methyl-3-pentenyl)cyclohex-3-ene-1-carbaldehyde   | Aldehyde                    |      |  | citrus,                | 0.21 |
|     |                                                |                                                        |                             |      |  | grassy,                |      |
|     |                                                |                                                        |                             | 1540 |  | aldehydi               |      |
|     |                                                |                                                        |                             |      |  | c, floral,             |      |
|     |                                                |                                                        |                             |      |  | marine                 |      |
| 103 | C <sub>14</sub> H <sub>30</sub>                | 3,5-Dimethyldodecane                                   | Hydrocarbons                | 1285 |  |                        | 0.2  |
| 104 | C <sub>5</sub> H <sub>10</sub> O <sub>2</sub>  | 2-Methylbutanoic acid                                  | Acid                        |      |  | pungent                | 0.2  |
|     |                                                |                                                        |                             | 863  |  | , acid,                |      |
|     |                                                |                                                        |                             |      |  | roquefor               |      |
|     |                                                |                                                        |                             |      |  | t, cheese              |      |
| 105 | C <sub>13</sub> H <sub>28</sub>                | Tridecane                                              | Hydrocarbons                | 1300 |  | alkane                 | 0.2  |
| 106 | C <sub>8</sub> H <sub>14</sub> O <sub>2</sub>  | 5-Hydroxyoctanoic acid lactone                         | Heterocyclic compound       | 1288 |  | coconut                | 0.2  |
| 107 | C <sub>10</sub> H <sub>16</sub> O <sub>2</sub> | 3-Methyl-3-(4-methylpent-3-enyl)oxirane-2-carbaldehyde | Aldehyde                    | 1234 |  |                        | 0.19 |
| 108 | C <sub>4</sub> H <sub>3</sub> NO <sub>2</sub>  | 1H-Pyrrole-2,5-dione                                   | Heterocyclic                | 987  |  |                        | 0.19 |

|     |                                                |                                   | compound                 |      |                                                                           |      |
|-----|------------------------------------------------|-----------------------------------|--------------------------|------|---------------------------------------------------------------------------|------|
| 109 | C <sub>8</sub> H <sub>16</sub> O               | 3,5-Dimethylcyclohexanol          | Alcohol                  | 1030 |                                                                           | 0.19 |
| 110 | C <sub>6</sub> H <sub>10</sub> O <sub>2</sub>  | 5-Methyl-delta-valerolactone      | Heterocyclic compound    | 1095 | creamy, fruity, coconut                                                   | 0.19 |
| 111 | C <sub>9</sub> H <sub>16</sub> O               | Trans-4-nonenal                   | Aldehyde                 | 1105 | fruity                                                                    | 0.18 |
| 112 | C <sub>7</sub> H <sub>14</sub> O <sub>2</sub>  | Hexanoic acid, methyl ester       | Ester                    |      | ethereal, fruity, pineapple, apricot, strawberry, tropical, banana, bacon | 0.17 |
| 113 | C <sub>12</sub> H <sub>25</sub> Br             | 2-Bromo dodecane                  | Halogenated hydrocarbons | 1505 |                                                                           | 0.17 |
| 114 | C <sub>10</sub> H <sub>22</sub>                | Decane                            | Hydrocarbons             | 1000 | alkane                                                                    | 0.16 |
| 115 | C <sub>6</sub> H <sub>9</sub> NOS              | 5-Thiazoleethanol, 4-methyl-      | Heterocyclic compound    | 1278 | fatty, cooked, beefy, juice                                               | 0.16 |
| 116 | C <sub>10</sub> H <sub>16</sub> O              | Hotrienol                         | Alcohol                  | 1106 | sweet, tropical, ocimene, fennel, ginger, myrcene                         | 0.16 |
| 117 | C <sub>12</sub> H <sub>23</sub> N              | Dodecanenitrile                   | Nitrogen compounds       | 1490 | citrus, orange, peel, metallic, spicy                                     | 0.16 |
| 118 | C <sub>10</sub> H <sub>16</sub> O              | 3,7-Dimethylocta-1,5,7-trien-3-ol | Alcohol                  | 1107 | mouldy                                                                    | 0.16 |
| 119 | C <sub>8</sub> H <sub>13</sub> NO <sub>2</sub> | Heliotridine                      | Heterocyclic compound    | 1495 |                                                                           | 0.16 |
| 120 | C <sub>16</sub> H <sub>34</sub>                | Hexadecane                        | Hydrocarbons             | 1600 | alkane                                                                    | 0.16 |
| 121 | C <sub>17</sub> H <sub>36</sub>                | Heptadecane                       | Hydrocarbons             | 1700 | alkane                                                                    | 0.16 |
| 122 | C <sub>9</sub> H <sub>20</sub> O               | 1-Nonanol                         | Alcohol                  | 1171 | fresh, clean, fatty, floral, rose,                                        | 0.15 |



|     |                                                |                                               |                          |      |                                                                            |      |
|-----|------------------------------------------------|-----------------------------------------------|--------------------------|------|----------------------------------------------------------------------------|------|
|     |                                                |                                               |                          |      | orange,<br>dusty,<br>wet, oily<br>pungent                                  | 0.15 |
| 123 | C <sub>9</sub> H <sub>16</sub> O               | 2,6,6-Trimethylcyclohexanone                  | Ketone                   |      | ,<br>thujone,<br>labdanu<br>m,<br>honey,<br>cistus                         |      |
|     |                                                |                                               |                          | 1036 |                                                                            |      |
| 124 | C <sub>10</sub> H <sub>20</sub> O <sub>2</sub> | <i>n</i> -Amyl isovalerate                    | Ester                    |      | apple,<br>fresh<br>fruit                                                   | 0.15 |
|     |                                                |                                               |                          | 1110 |                                                                            |      |
| 125 | C <sub>10</sub> H <sub>18</sub>                | 2,6-Dimethyl-trans-2,6-octadiene              | Hydrocarbons             | 978  |                                                                            | 0.15 |
| 126 | C <sub>5</sub> H <sub>10</sub> N <sub>2</sub>  | 5,5-Dimethyl-4,5-dihydro-1 <i>H</i> -pyrazole | Heterocyclic<br>compound | 983  |                                                                            | 0.15 |
| 127 | C <sub>10</sub> H <sub>16</sub> O <sub>2</sub> | Lilac aldehyde <i>D</i>                       | Aldehyde                 | 1169 | sweet,<br>flowery                                                          | 0.15 |
| 128 | C <sub>10</sub> H <sub>16</sub> O <sub>2</sub> | Lilac aldehyde <i>C</i>                       | Aldehyde                 | 1167 | sweet,<br>flowery                                                          | 0.15 |
| 129 | C <sub>9</sub> H <sub>16</sub> O <sub>2</sub>  | 2,2,5-Trimethylhexane-3,4-dione               | Ketone                   | 1039 |                                                                            | 0.14 |
| 130 | C <sub>10</sub> H <sub>20</sub> O <sub>2</sub> | Butanoic acid, 3-methyl-, 2-methylbutyl ester | Ester                    |      | herbal,<br>fruity,<br>earthy,<br>cheese,<br>apple,<br>green                | 0.14 |
|     |                                                |                                               |                          | 1107 |                                                                            |      |
| 131 | C <sub>10</sub> H <sub>18</sub> O              | 2-Isopropyl-5-methylhex-2-enal                | Aldehyde                 |      | herbal,<br>lavender<br>, woody,<br>green,<br>blueberr<br>y,<br>tomato      | 0.14 |
|     |                                                |                                               |                          | 1106 |                                                                            |      |
| 132 | C <sub>10</sub> H <sub>20</sub> O              | 4-Methyl-5-nonanone                           | Ketone                   | 1116 |                                                                            | 0.14 |
| 133 | C <sub>10</sub> H <sub>20</sub> O <sub>2</sub> | 3-Methylheptyl acetate                        | Ester                    | 1118 |                                                                            | 0.14 |
| 134 | C <sub>8</sub> H <sub>8</sub> O <sub>2</sub>   | Benzeneacetic acid                            | Acid                     |      | sweet,<br>honey,<br>floral,<br>honeysu<br>ckle,<br>sour,<br>waxy,<br>civet | 0.13 |
|     |                                                |                                               |                          | 1262 |                                                                            |      |

|     |                                                |                                                 |                       |      |                                                                                                      |      |
|-----|------------------------------------------------|-------------------------------------------------|-----------------------|------|------------------------------------------------------------------------------------------------------|------|
| 135 | C <sub>13</sub> H <sub>26</sub> O              | Tridecane                                       | Aldehyde              |      | fresh,<br>clean,<br>aldehydi<br>c, soapy,<br>1513 citrus,<br>petal,<br>waxy,<br>grapefru<br>it, peel | 0.13 |
| 136 | C <sub>8</sub> H <sub>16</sub> O               | (E)-2-Octen-1-ol                                | Alcohol               |      | green,<br>1068 citrus,<br>vegetabl<br>e, fatty                                                       | 0.13 |
| 137 | C <sub>9</sub> H <sub>16</sub> O <sub>2</sub>  | Cyclohexanecarboxylic acid, ethyl ester         | Ester                 |      | fruity,<br>1136 cheese,<br>winey                                                                     | 0.13 |
| 138 | C <sub>10</sub> H <sub>20</sub> O              | 1-Methyl-4-propan-2-ylcyclohexan-1-ol           | Terpenoids            | 1138 |                                                                                                      | 0.13 |
| 139 | C <sub>9</sub> H <sub>10</sub> O <sub>3</sub>  | Apocynin                                        | Ketone                |      | faint,<br>1493 sweet,<br>vanillin                                                                    | 0.13 |
| 140 | C <sub>14</sub> H <sub>20</sub> O <sub>2</sub> | Butanoic acid, 1,1-dimethyl-2-phenylethyl ester | Ester                 |      | floral,<br>green,<br>1493 herbal,<br>fruity,<br>plum,<br>prune                                       | 0.12 |
| 141 | C <sub>6</sub> H <sub>10</sub> O               | Cyclohexanone                                   | Ketone                | 894  | minty,<br>acetone                                                                                    | 0.12 |
| 142 | C <sub>3</sub> H <sub>10</sub> N <sub>2</sub>  | 1,3-PropanediAmine                              | Amine                 | 805  |                                                                                                      | 0.12 |
| 143 | C <sub>12</sub> H <sub>20</sub> O <sub>2</sub> | Fenchyl acetate                                 | Ester                 |      | fresh,<br>sweet,<br>1224 pine, fir,<br>herbal,<br>citrus                                             | 0.12 |
| 144 | C <sub>7</sub> H <sub>12</sub> O <sub>2</sub>  | 2-Propenoic acid, butyl ester                   | Ester                 | 896  |                                                                                                      | 0.12 |
| 145 | C <sub>7</sub> H <sub>9</sub> NO <sub>2</sub>  | 3-Ethyl-4-methylpyrrole-2,5-dione               | Heterocyclic compound | 1239 |                                                                                                      | 0.12 |
| 146 | C <sub>9</sub> H <sub>18</sub> O               | 2-Nonen-1-ol                                    | Alcohol               |      | sweet,<br>fatty,<br>melon,<br>1105 cucumb<br>er,<br>vegetabl<br>e                                    | 0.12 |

|     |                                                 |                                                                        |                             |      |                                                                                        |      |
|-----|-------------------------------------------------|------------------------------------------------------------------------|-----------------------------|------|----------------------------------------------------------------------------------------|------|
| 147 | C <sub>16</sub> H <sub>34</sub>                 | 5,8-Diethyldodecane                                                    | Hydrocarbons                | 1572 |                                                                                        | 0.12 |
| 148 | C <sub>10</sub> H <sub>18</sub> O               | 2,6,6-Trimethylbicyclo[3.1.1]heptan-3-ol                               | Terpenoids                  | 1179 |                                                                                        | 0.12 |
| 149 | C <sub>11</sub> H <sub>22</sub> O <sub>2</sub>  | Butanoic acid, 3-methyl-, hexyl ester                                  | Ester                       |      | sweet,<br>green<br>fruit,<br>apple,<br>1244 unripe<br>apple<br>skin,<br>strawber<br>ry | 0.11 |
| 150 | C <sub>10</sub> H <sub>12</sub> O <sub>2</sub>  | Acetic acid, 2-phenylethyl ester                                       | Ester                       |      | floral,<br>rose,<br>1260 sweet,<br>honey,<br>fruity,<br>tropical                       | 0.11 |
| 151 | C <sub>10</sub> H <sub>18</sub> O               | 1,7,7-Trimethylbicyclo[2.2.1]heptan-2-ol                               | Terpenoids                  | 1138 |                                                                                        | 0.11 |
| 152 | C <sub>7</sub> H <sub>15</sub> NO <sub>2</sub>  | 2-Propanol, 1-(dimethylamino)-, acetate (ester)                        | Ester                       | 869  |                                                                                        | 0.11 |
| 153 | C <sub>6</sub> H <sub>10</sub> N <sub>2</sub>   | 2-Propyl-1 <i>H</i> -imidazole                                         | Heterocyclic<br>compound    | 1095 |                                                                                        | 0.11 |
| 154 | C <sub>9</sub> H <sub>10</sub> O <sub>2</sub>   | Paroxypropione                                                         | Ketone                      | 1534 | phenol                                                                                 | 0.11 |
| 155 | C <sub>10</sub> H <sub>18</sub> O               | ( <i>E</i> )-2,6-Dimethylocta-5,7-dien-2-ol                            | Alcohol                     | 1169 |                                                                                        | 0.11 |
| 156 | C <sub>9</sub> H <sub>10</sub> O <sub>3</sub>   | 3,4-Dimethoxybenzaldehyde                                              | Aldehyde                    |      | sweet,<br>1489 woody,<br>vanilla                                                       | 0.1  |
| 157 | C <sub>15</sub> H <sub>24</sub>                 | Ylangene                                                               | Terpenoids                  | 1372 |                                                                                        | 0.1  |
| 158 | C <sub>9</sub> H <sub>14</sub> O                | 2-Amylfuran                                                            | Heterocyclic<br>compound    |      | fruity,<br>green,<br>earthy,<br>993 beany,<br>vegetabl<br>e,<br>metallic               | 0.1  |
| 159 | C <sub>5</sub> H <sub>7</sub> ClO               | Cyclobutanecarboxylic acid chloride                                    | Halogenated<br>hydrocarbons | 853  |                                                                                        | 0.1  |
| 160 | C <sub>11</sub> H <sub>13</sub> NO <sub>3</sub> | <i>N</i> -Benzyloxy-2-carbomethoxyaziridine                            | Heterocyclic<br>compound    | 1550 |                                                                                        | 0.1  |
| 161 | C <sub>10</sub> H <sub>18</sub> O               | 1-Decen-3-one                                                          | Ketone                      | 1141 |                                                                                        | 0.1  |
| 162 | C <sub>10</sub> H <sub>16</sub> O               | Isopinocarveol                                                         | Terpenoids                  |      | woody,<br>1178 warm,<br>balsamic                                                       | 0.1  |
| 163 | C <sub>13</sub> H <sub>22</sub> O <sub>2</sub>  | 3-Cyclohexene-1-methanol, .alpha.,.alpha.,4-tri<br>methyl-, propanoate | Terpenoids                  | 1432 | herbal,<br>green,                                                                      | 0.1  |

|     |                                  |               |            |      |                                                      |       |
|-----|----------------------------------|---------------|------------|------|------------------------------------------------------|-------|
|     |                                  |               |            |      | old<br>wood,<br>citrus,<br>geraniu<br>m,<br>tropical |       |
| 164 | C <sub>9</sub> H <sub>16</sub> O | 3-Nonen-5-one | Ketone     | 1052 |                                                      | 0.1   |
| 165 | C <sub>15</sub> H <sub>24</sub>  | Isodene       | Terpenoids | 1375 | Odor                                                 | 0.1   |
|     |                                  | Total         |            |      |                                                      | 79.83 |

(RI: Retention index of compounds on non-polar chromatographic column; Odor: describes the substance's aroma; I: shows the relative abundance of detected VOCs.)
